# Supplementary material for: Impact of retreatment with an artemisinin-based combination on malaria incidence and its potential selection of resistant strains: study protocol for a randomized controlled clinical trial
Source: PubMed Central journal article supplement (PMC3849445; doi:10.1186/1745-6215-14-307), 2013-09-23
Supplement: 1745-6215-14-307-S1.pdf [file 1745-6215-14-307-S1.pdf]

### Additional file 1 Follow-up Chart Pre-RCT Phase

| Day                     | 0 | 1 | 2  | 14 <sup>1</sup> | 28 <sup>1</sup> | 42 <sup>1</sup> | Any other day <sup>1</sup> |
|-------------------------|---|---|----|-----------------|-----------------|-----------------|----------------------------|
| History (symptoms)      | X |   |    | X               | X               | X               | X                          |
| Examination (clinical)  | X | X | X  | X*              | X*              | X               | X                          |
| Temperature             | X | X | X  | X*              | X*              | X               | X                          |
| Rapid diagnostic test   | X |   |    |                 |                 |                 |                            |
| Blood film              | X |   | X* | X*              | X*              | X               | X*                         |
| Filter paper PCR        | X |   | X* | X*              | X*              | X               | X*                         |
| Informed consent        | X |   |    |                 |                 |                 |                            |
| Haematology             | X |   |    |                 |                 |                 |                            |
| Serum sample            | X |   |    |                 |                 |                 |                            |
| Treatment               | X | X | X  |                 |                 |                 |                            |
| Adverse events          | X | X | X  | X               | X               | X               | X                          |
| Concomitant medications | X | X | X  | X               | X               | X               | X                          |

X = perform this task; \* only if symptoms indicate a possible clinical treatment failure

<sup>1</sup> For a clinical treatment failure see day 0 RCT phase
