# Supplementary material for: Impact of retreatment with an artemisinin-based combination on malaria incidence and its potential selection of resistant strains: study protocol for a randomized controlled clinical trial
Source: PubMed Central journal article supplement (PMC3849445; doi:10.1186/1745-6215-14-307), 2013-09-23
Supplement: 1745-6215-14-307-S2.pdf [file 1745-6215-14-307-S2.pdf]

**Additional file 2 Follow-up Chart RCT Phase (and post-RCT)**

| Day                     | 0 | 1 | 2 | 3              | 4-6            | 7 | 14 <sup>1</sup> | 21 <sup>1</sup> | 28 <sup>1</sup> | Any other day <sup>1</sup> |
|-------------------------|---|---|---|----------------|----------------|---|-----------------|-----------------|-----------------|----------------------------|
| History (symptoms)      | X |   |   |                |                | X | X               | X               | X               | X                          |
| Examination (clinical)  | X | X | X | X              |                | X | X               | X               | X               | X                          |
| Temperature             | X | X | X | X              |                | X | X               | X               | X               | X                          |
| Blood film              | X | X | X | X              |                | X | X               | X               | X               | X                          |
| Filter paper PCR        | X | X | X | X              |                | X | X               | X               | X               | X                          |
| Informed consent        | X |   |   |                |                |   |                 |                 |                 |                            |
| Haematology             | X |   |   |                |                |   | X               |                 | X               | X                          |
| Serum sample            | X |   |   |                |                |   |                 |                 |                 |                            |
| Treatment               | X | X | X | X <sup>1</sup> | X <sup>1</sup> |   |                 |                 |                 |                            |
| Adverse events          | X | X | X | X              | X <sup>1</sup> | X | X               | X               | X               | X                          |
| Concomitant medications | X | X | X | X              | X <sup>1</sup> | X | X               | X               | X               | X                          |

X<sup>1</sup> = quinine + clindamycin treatment administration; only for RCT phase

<sup>1</sup> For a treatment failure see day 0 Post-RCT phase
